# Supplementary material for: Prevalence and Co-occurrence of Alcohol, Nicotine, and Other Substance Use Disorder Diagnoses Among US Transgender and Cisgender Adults
Source: PubMed Central journal article supplement (PMC7862992; doi:10.1001/jamanetworkopen.2020.36512), 2021-02-04
Supplement: jamanetwopen-e2036512-s001.pdf [file jamanetwopen-e2036512-s001.pdf]

## Supplemental Online Content

Hughto JMW, Quinn EK, Dunbar MS, Rose AJ, Shireman TI, Jasuja GK. Prevalence and co-occurrence of alcohol, nicotine, and other substance use disorder diagnoses among US transgender and cisgender adults. *JAMA Netw Open*. 2021;4(2):e2036512.  
doi:10.1001/jamanetworkopen.2020.36512

**eAppendix.** List of Substance Use Disorder Diagnoses Codes

This supplemental material has been provided by the authors to give readers additional information about their work.

**eAppendix.** List of Substance Use Disorder Diagnoses Codes

Alcohol:

ICD10        F10.x G62.1 I42.6 K29.2 K70.x T51.0

Cannabis

ICD10        F12.x

Opioid

ICD10        F11.x

Sedatives

ICD10        F13.x

Cocaine

ICD10        F13.x

Nicotine

ICD10        F17.x Z87.8

Other Drugs (inclusive of stimulant and hallucinogen SUD)

ICD10        F19.x F18.x F15.x F16.x

Polysubstance\*

Two or more of any of the above codes in a give year
